# Supplementary material for: Facile laser-assisted synthesis of inorganic nanoparticles covered by a carbon shell with tunable luminescence
Source: Royal Society of Chemistry journal article supplement (doi:10.1039/c5ra07319g), 2015-01-01
Supplement: c5ra07319g1.pdf [file c5ra07319g1.pdf]

## Supporting Information for Publication

Manuscript:

Facile laser-assisted synthesis of inorganic nanoparticles covered by carbon shell with tunable luminescence

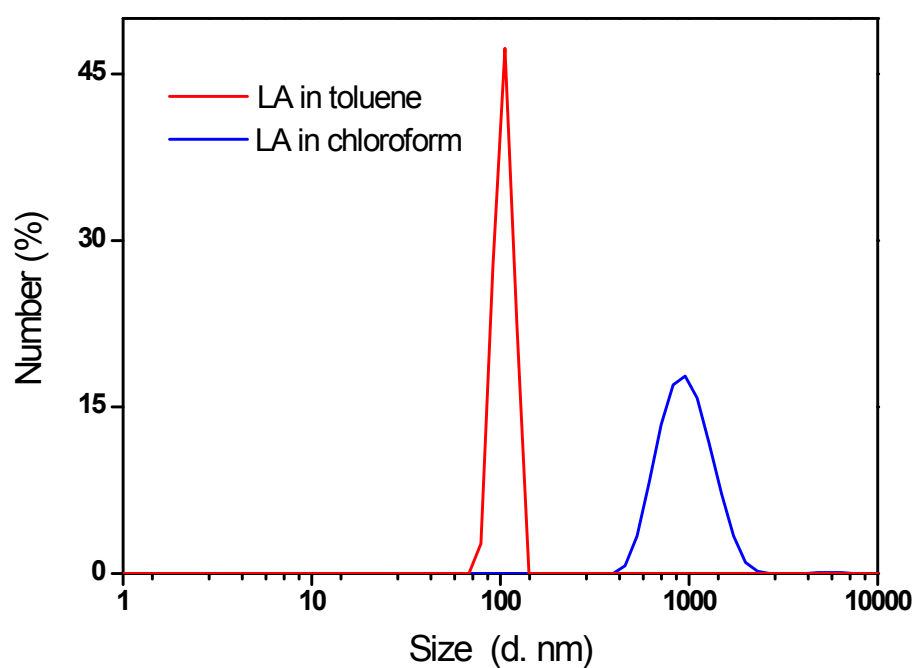

**Figure S1.** The results of DLS analysis of NPs obtained by laser ablation of LiNbO<sub>3</sub> target in toluene (red line) and chloroform (blue line).

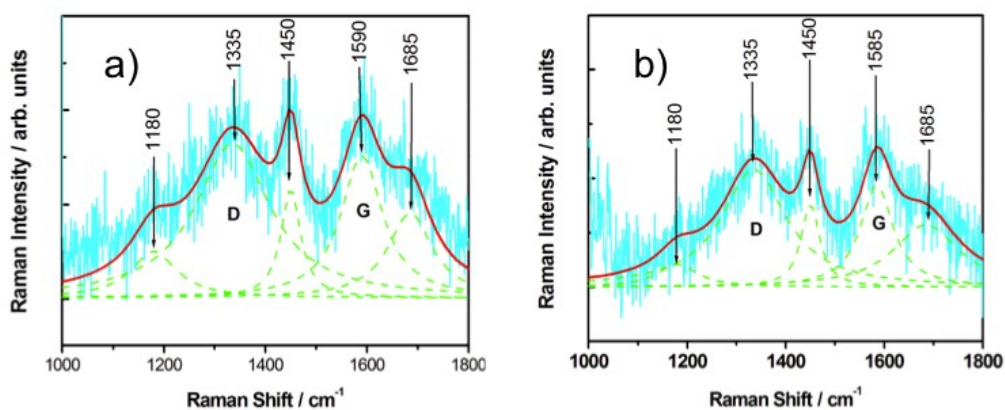

**Figure S2.** Raman spectra of the products of Au target ablation in toluene (a) and chloroform (b).

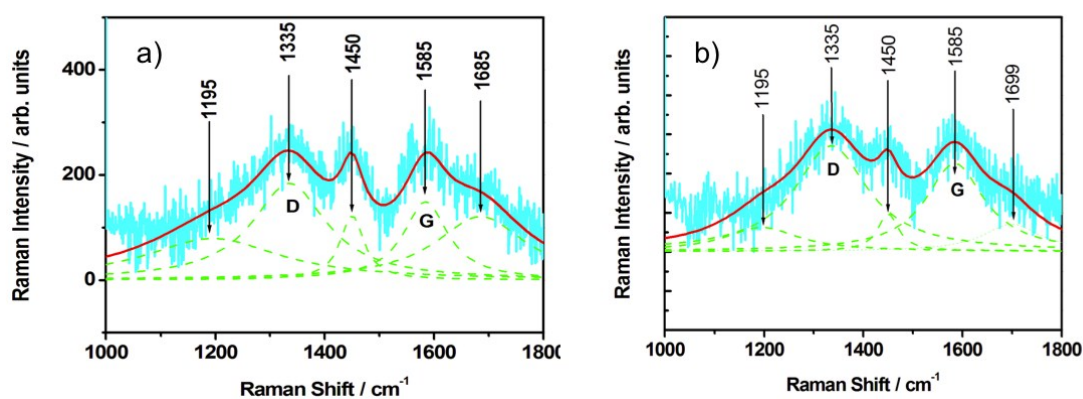

**Figure S3.** Raman spectra of the products of Si target ablation in toluene (a) and chloroform (b).

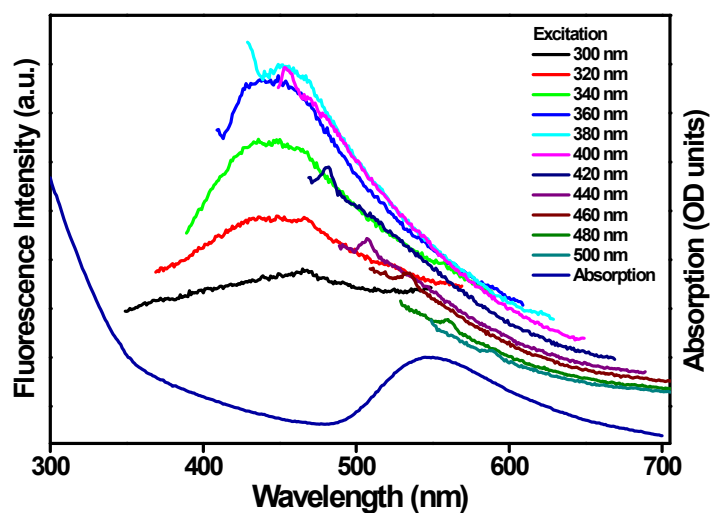

**Figure S4.** PL spectra of a suspension of NPs produced by PLAL of Au target in chloroform. Excitation of the PL was at 300 to 500 nm. Absorption spectrum is also shown (solid grey line).

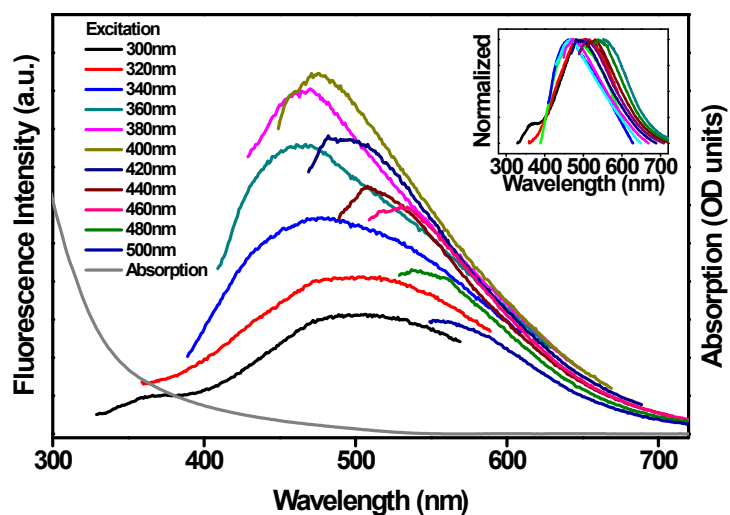

**Figure S5.** PL spectra of the suspension of NPs produced by PLAL of Si target in chloroform. Excitation of the PL was at 300 to 500 nm. Absorption spectrum is also shown (solid grey line).

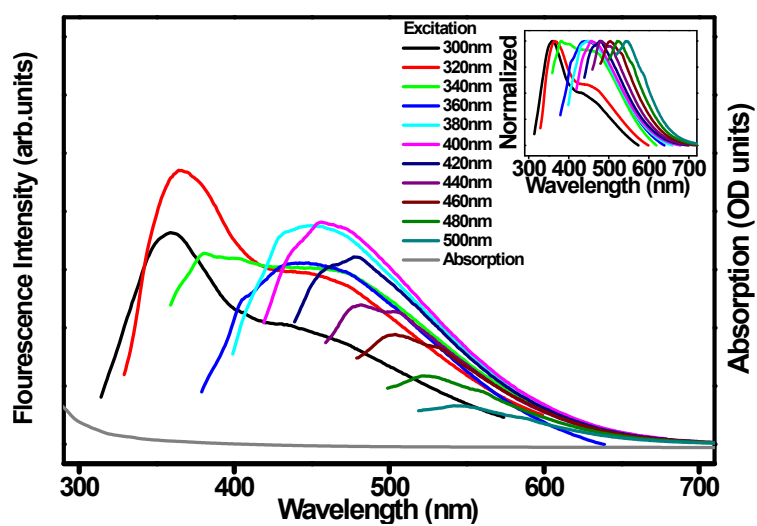

**Figure S6.** PL spectra of the suspension of NPs produced by PLAL of Au target in toluene. Excitation of the PL was at 300 to 500 nm. Absorption spectrum is also shown (solid grey line)
